# Supplementary material for: Protective Effects of Scutellarin on Type II Diabetes Mellitus-Induced Testicular Damages Related to Reactive Oxygen Species/Bcl-2/Bax and Reactive Oxygen Species/Microcirculation/Staving Pathway in Diabetic Rat
Source: Hindawi journal article supplement (doi:10.1155/2015/252530), 2015-01-01
Supplement: f1 [file 252530.f1.pdf]

## Supplemental table

**Supplemental table 1A.** Mean values of body weights of three experimental group at every week. Data are presented as mean  $\pm$  SEM.

|        | Body weight(g)     |                    |                    |
|--------|--------------------|--------------------|--------------------|
|        | Control            | Diabetes           | Diabetes+SCU       |
| Week1  | 240.67 $\pm$ 7.45  | 243.00 $\pm$ 3.61  | 246.17 $\pm$ 15.16 |
| Week2  | 245.50 $\pm$ 12.08 | 246.50 $\pm$ 9.25  | 249.67 $\pm$ 13.58 |
| Week3  | 245.34 $\pm$ 15.38 | 258.50 $\pm$ 5.44  | 260.67 $\pm$ 14.46 |
| Week4  | 249.17 $\pm$ 14.45 | 266.67 $\pm$ 3.68  | 265.34 $\pm$ 13.47 |
| Week5  | 257.17 $\pm$ 18.76 | 275.34 $\pm$ 6.24  | 291.50 $\pm$ 17.10 |
| Week6  | 257.34 $\pm$ 17.19 | 282.37 $\pm$ 7.52  | 302.17 $\pm$ 17.88 |
| Week7  | 254.17 $\pm$ 15.44 | 291.84 $\pm$ 12.54 | 314.34 $\pm$ 18.46 |
| Week8  | 269.00 $\pm$ 26.79 | 308.00 $\pm$ 14.88 | 312.34 $\pm$ 16.18 |
| Week9  | 283.67 $\pm$ 21.79 | 309.34 $\pm$ 20.52 | 285.32 $\pm$ 20.80 |
| Week10 | 295.67 $\pm$ 23.41 | 295.00 $\pm$ 21.15 | 278.50 $\pm$ 19.25 |
| Week11 | 320.00 $\pm$ 30.13 | 278.33 $\pm$ 21.37 | 269.50 $\pm$ 21.82 |
| Week12 | 306.34 $\pm$ 22.11 | 262.50 $\pm$ 22.82 | 251.84 $\pm$ 27.75 |
| Week13 | 309.17 $\pm$ 28.12 | 239.50 $\pm$ 23.08 | 242.50 $\pm$ 26.29 |
| Week14 | 320.67 $\pm$ 25.55 | 224.34 $\pm$ 22.65 | 242.50 $\pm$ 29.63 |
| Week15 | 335.17 $\pm$ 31.02 | 208.34 $\pm$ 31.01 | 224.83 $\pm$ 22.46 |
| Week16 | 347.67 $\pm$ 33.76 | 201.50 $\pm$ 32.87 | 234.34 $\pm$ 21.97 |

**Supplemental table 1B.** Mean values of blood glucose of three experimental group at 8-16week. Data are presented as mean  $\pm$  SEM.

|        | Plasma glucose (mmol/L) |                  |                   |
|--------|-------------------------|------------------|-------------------|
|        | Control                 | Diabetes         | Diabetes+SCU      |
| Week8  | 6.73 $\pm$ 0.61         | 5.53 $\pm$ 0.70  | 5.98 $\pm$ 0.66   |
| Week9  | 6.57 $\pm$ 0.19         | 28.05 $\pm$ 0.73 | 26.38 $\pm$ 0.39  |
| Week10 | 6.71 $\pm$ 0.58         | 27.98 $\pm$ 0.74 | 26.50 $\pm$ 0.60  |
| Week11 | 6.87 $\pm$ 0.46         | 28.08 $\pm$ 0.75 | 26.32 $\pm$ 0.41  |
| Week12 | 7.03 $\pm$ 0.47         | 28.02 $\pm$ 0.75 | 26.53 $\pm$ 0.89  |
| Week13 | 7.13 $\pm$ 0.26         | 28.15 $\pm$ 0.89 | 26.34 $\pm$ 0.808 |
| Week14 | 7.16 $\pm$ 0.40         | 28.00 $\pm$ 0.73 | 26.34 $\pm$ 0.41  |
| Week15 | 7.10 $\pm$ 0.21         | 27.95 $\pm$ 0.64 | 26.54 $\pm$ 0.61  |
| Week16 | 6.90 $\pm$ 0.22         | 27.92 $\pm$ 0.73 | 26.48 $\pm$ 0.43  |

**Supplemental table 2.** Comparison of serum TG, TC, LDL)and high-density lipoprotein (HDL) in three experimental groups. Data are presented as mean  $\pm$  SEM.

|                | Control         | Diabetes        | Diabetes+SCU    |
|----------------|-----------------|-----------------|-----------------|
| TC (mmol/L)    | 0.92 $\pm$ 0.13 | 1.16 $\pm$ 0.19 | 1.10 $\pm$ 0.23 |
| TG (mmol/L)    | 0.99 $\pm$ 0.17 | 1.13 $\pm$ 0.25 | 0.97 $\pm$ 0.41 |
| HDL-C (mmol/L) | 1.21 $\pm$ 0.26 | 1.47 $\pm$ 0.34 | 1.39 $\pm$ 0.38 |
| LDL-C (mmol/L) | 0.67 $\pm$ 0.13 | 0.74 $\pm$ 0.14 | 0.75 $\pm$ 0.26 |
